# Supplementary material for: Structural basis for antibiotics murepavadin and thanatin targeting the lipopolysaccharide insertase LptD
Source: Research Square preprint supplement (doi:10.21203/rs.3.rs-8115403/v1), 2025-12-24
Supplement: Supplementary file 1 [file c15334971682ef063fccadc5.pdf]

Supplementary Materials for

**Structural basis for antibiotics murepavadin and thanatin targeting the  
lipopolysaccharide insertase LptD**

**Authors**

Philippe A. Lehner<sup>1</sup>, Laetitia Rožić<sup>1</sup>, Seyed Majed Modaresi<sup>1,2</sup>, Kristyna Pluhackova<sup>3</sup>, Peter Zbinden<sup>4</sup>, Daniel Obrecht<sup>4</sup>, Jaroslaw Sedzicki<sup>1\*</sup>, Sebastian Hiller<sup>1\*</sup>

**This PDF file includes:**

Figs. S1–S12

Tables S1–S3

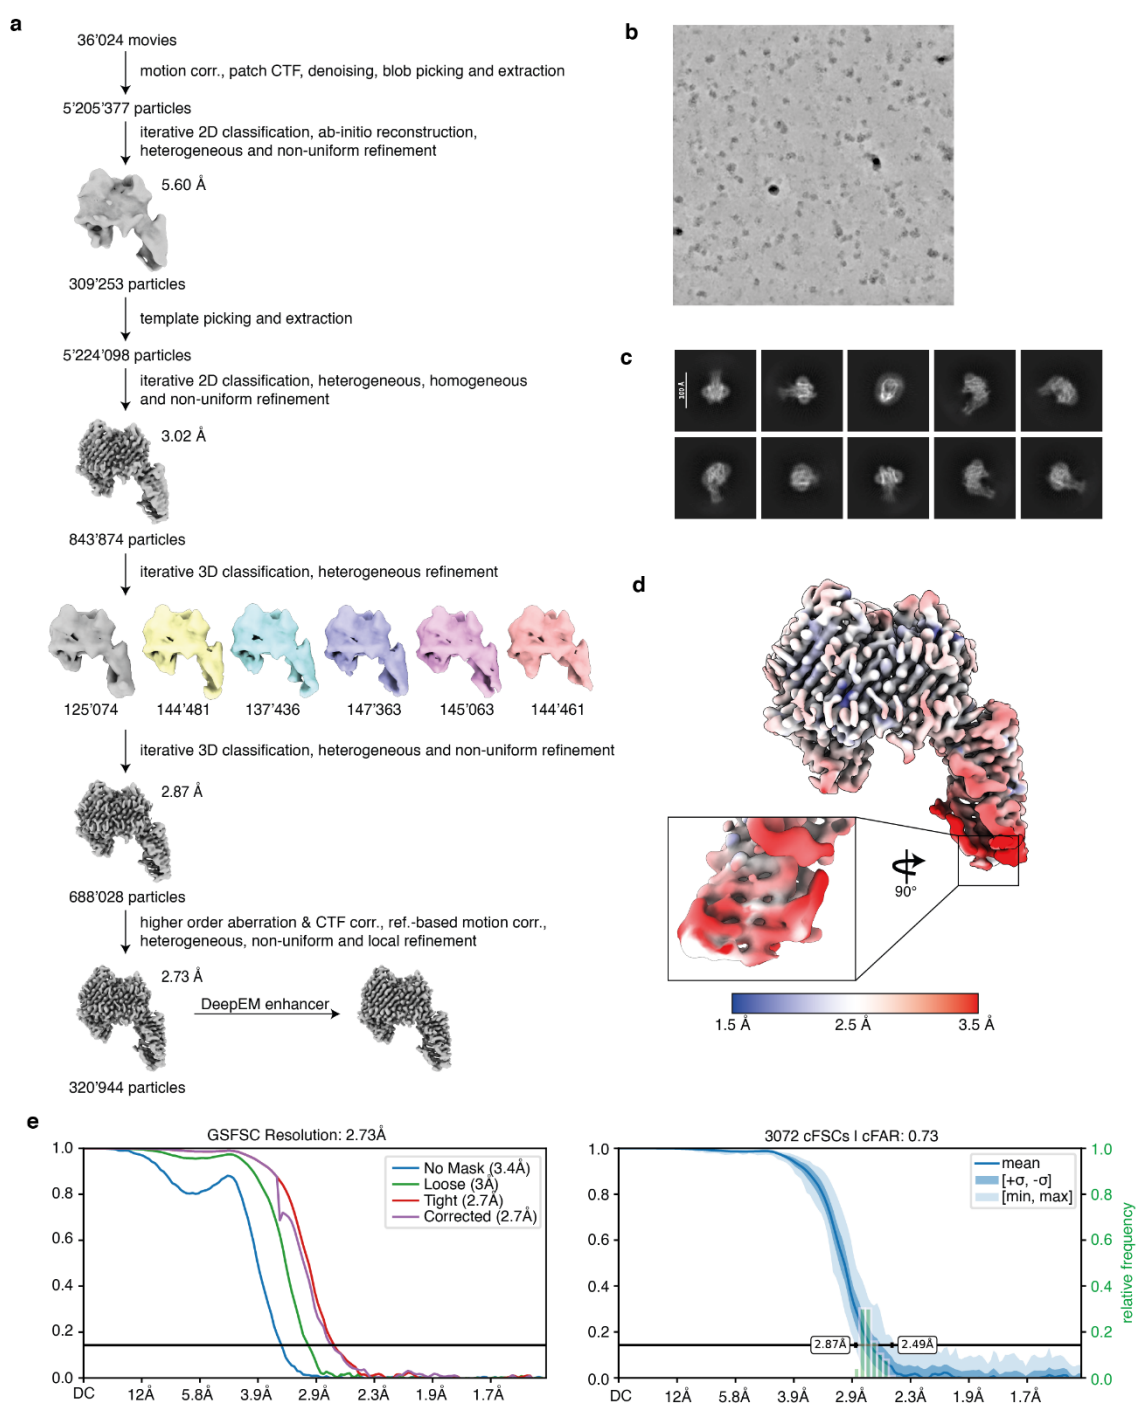

**Fig. S1. Cryo-EM data processing of LptDEM<sub>Eco</sub>-thanatin.** **a** Schematic overview of the processing workflow. See Materials and Methods for details. **b** Representative example of a denoised micrograph. **c** Representative example classes that were selected during iterative 2D classification. **d** Local resolution map (red: low-resolution, blue: high-resolution) with a close-up of the distal LptD  $\beta$ -jellyroll domain with thanatin bound. **e** Gold-standard Fourier shell correlation (GSFSC) curve and conical Fourier shell correlation (cFSC) | conical FSC area ratio (cFAR) plot.

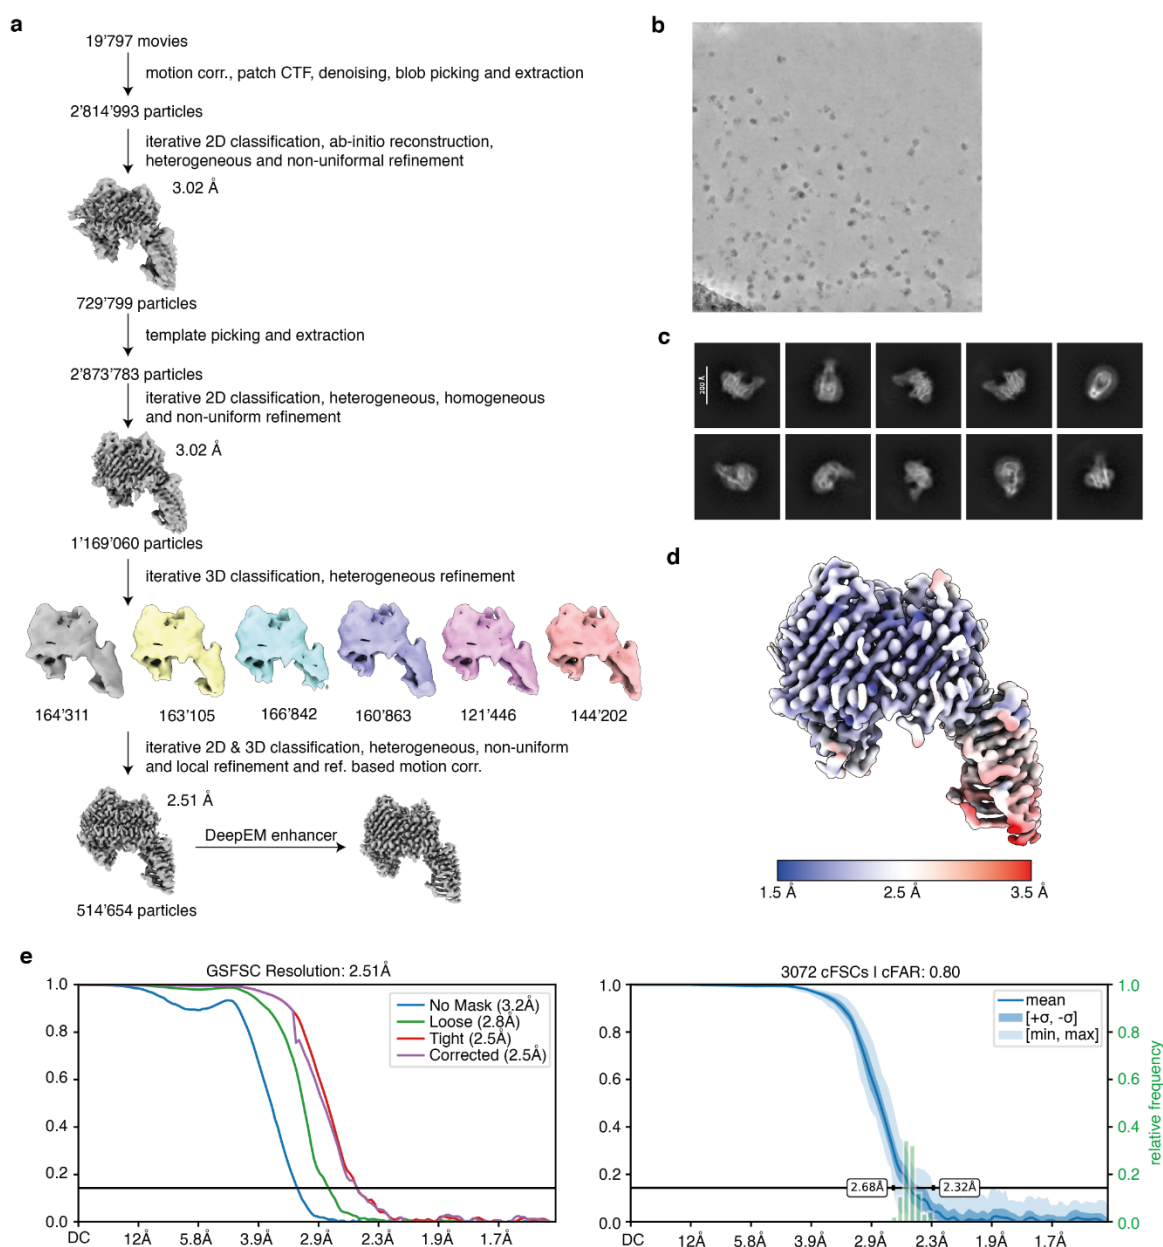

**Fig. S2. Cryo-EM data processing of apo LptDEM<sub>Eco</sub>.** **a** Schematic overview of the processing workflow. See Materials and Methods for details. **b** Representative example of a denoised micrograph. **c** Representative example classes that were selected during iterative 2D classification. **d** Local resolution map (red: low-resolution, blue: high-resolution). **e** Gold-standard Fourier shell correlation (GSFSC) curve and conical Fourier shell correlation (cFSC) | conical FSC area ratio (cFAR) plot.





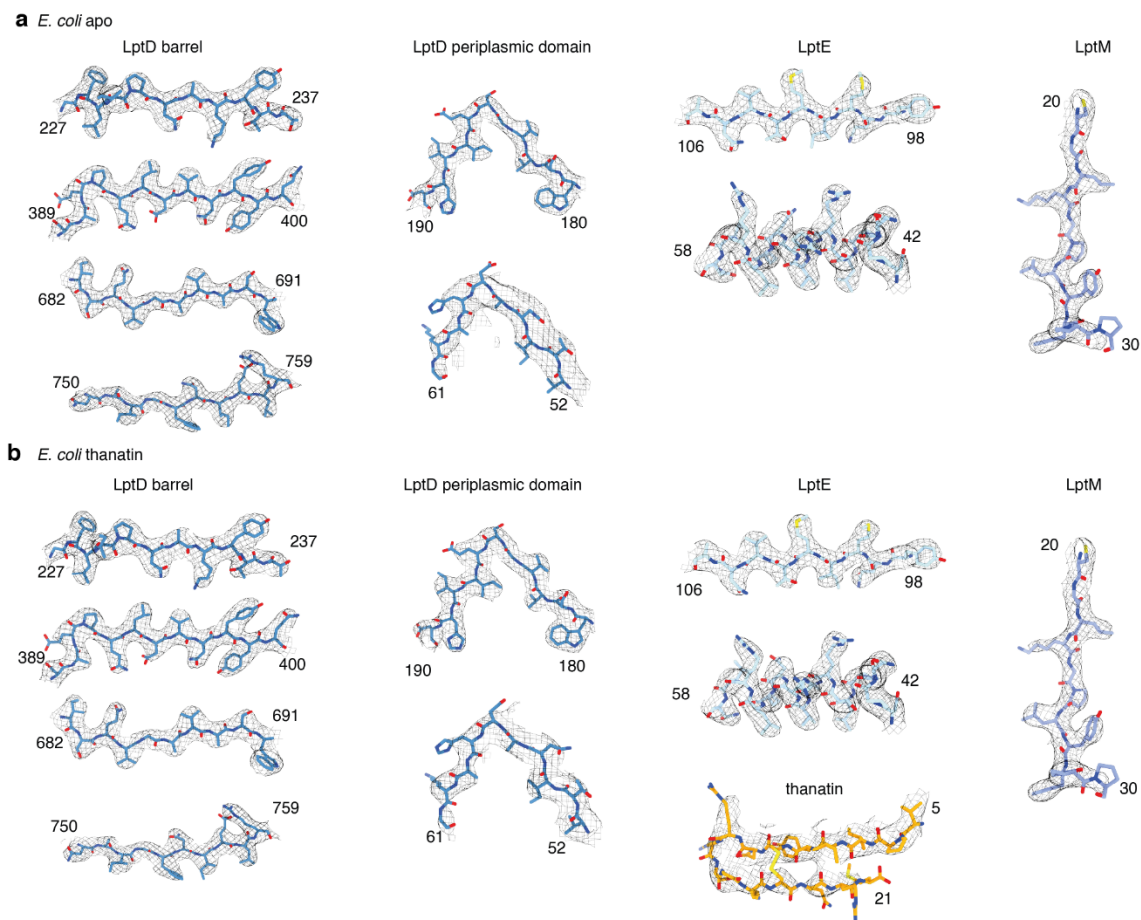

**Fig. S4. Structural models of LptDEM<sub>Eco</sub> with and without thanatin.** Representative examples of each chain of the model (LptD, LptE, LptM and ligand) at different regions of the structures, with the first and last amino acid number labeled, shown individually within the experimentally determined cryo-EM map (grey mesh) at appropriate contour levels of **a** apo LptDEM<sub>Eco</sub> and **b** LptDEM<sub>Eco</sub>–thanatin.

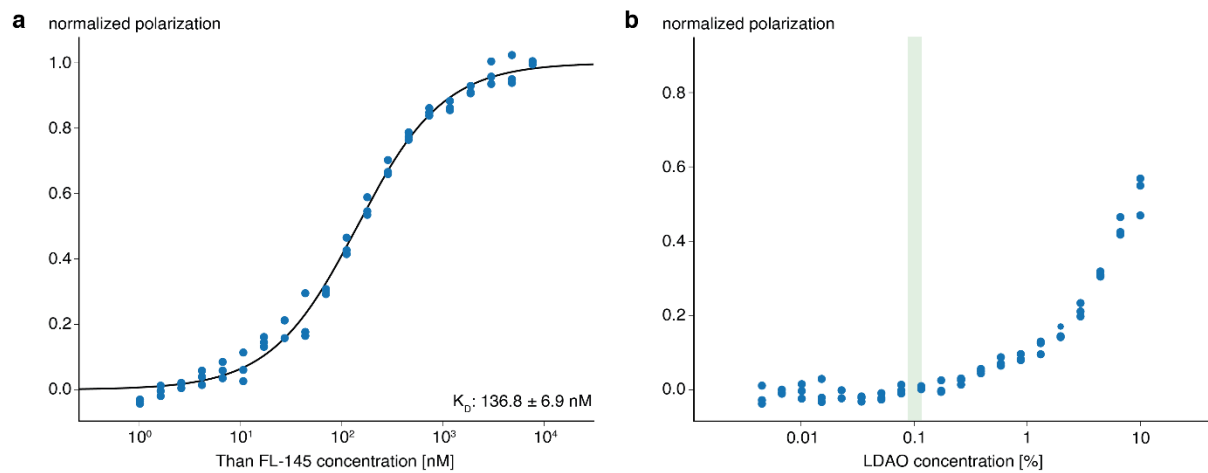

**Fig. S5. Affinity determinations of thanatin.** **a** Direct fluorescence polarization assay of fluorescently labeled thanatin (Than FL-145, fluorophore: Alexa Fluor 647) binding to LptDEM<sub>Eco</sub>. Experimental data are shown as dots and the non-linear fit to the data as solid line, with the resulting  $K_D$  indicated. **b** Direct fluorescence polarization assay of LDAO binding to fluorescently labeled thanatin. The concentration of LDAO in the LptDEM<sub>Eco</sub> sample is shown in green. This control thus shows that the binding observed in (a) is not due to detergent binding.

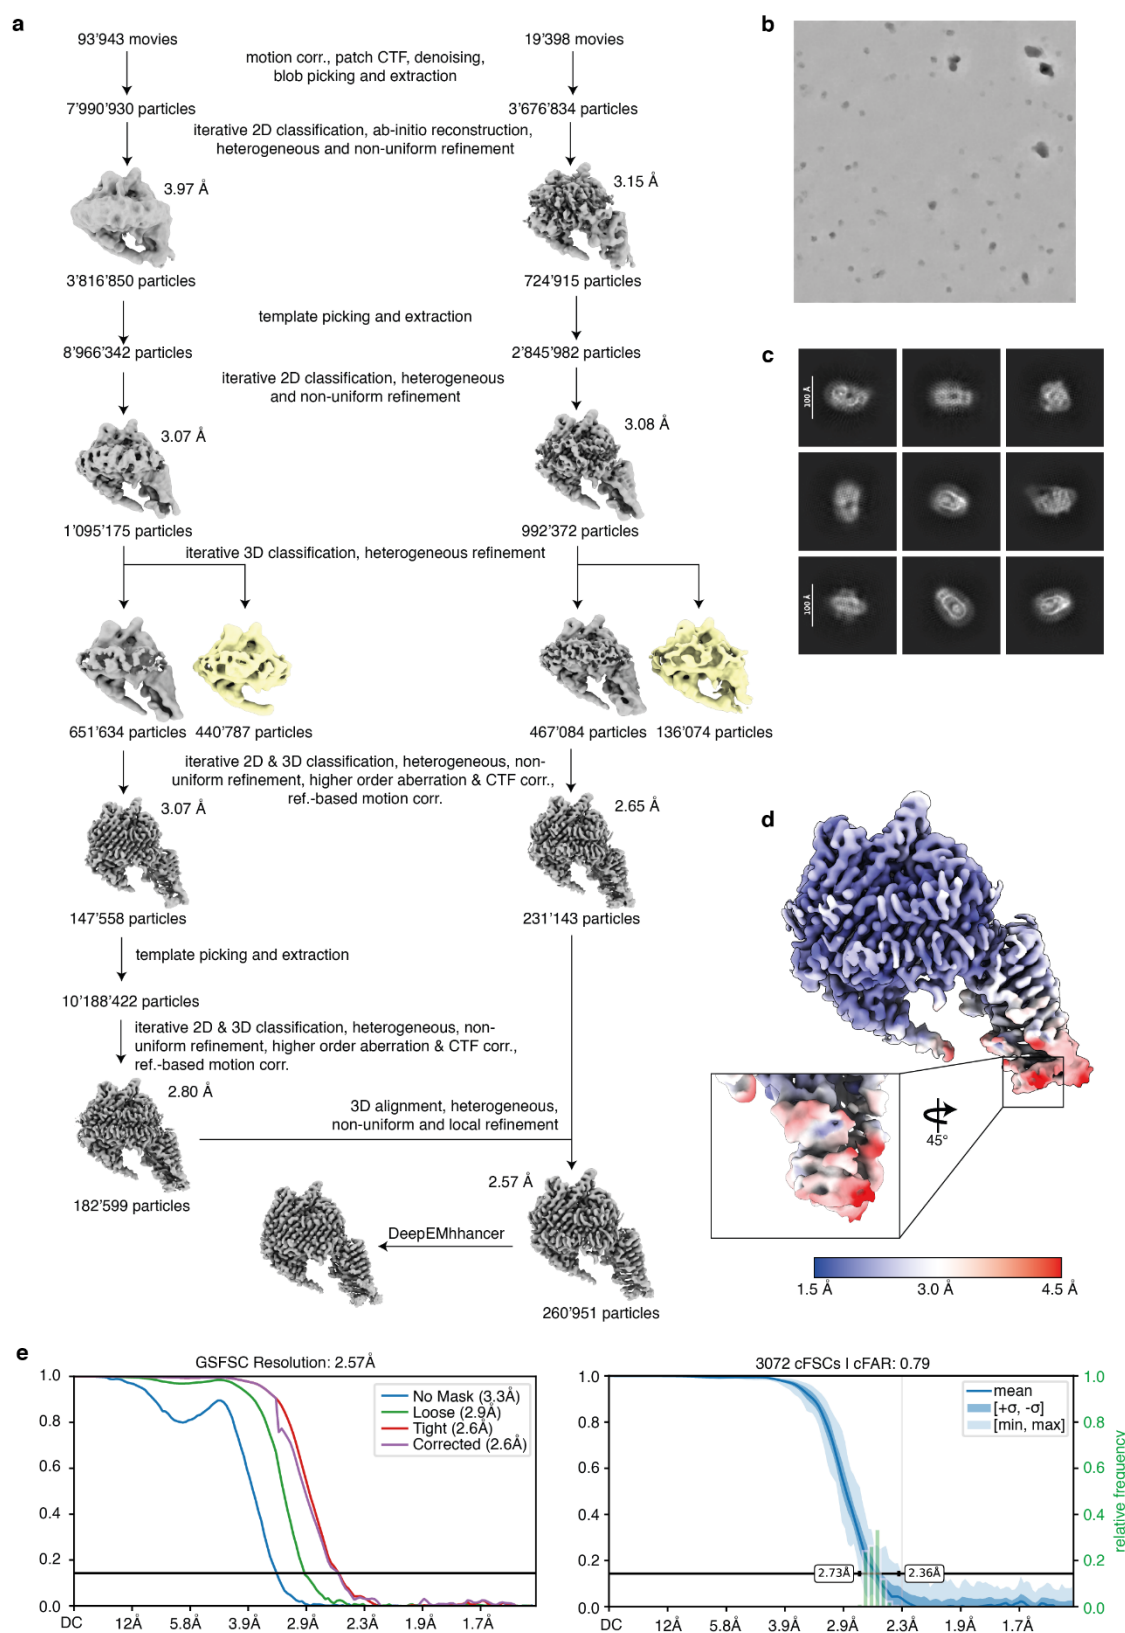

**Fig. S6. Cryo-EM data processing of LptDEMPae-murepavadin.** **a** Schematic overview of the processing workflow. See Materials and Methods for details. **b** Representative example of a denoised micrograph. **c** Representative example classes that were selected during iterative 2D

classification. **d** Local resolution map (red: low-resolution, blue: high-resolution) with a close-up of the distal LptD  $\beta$ -jellyroll domain with murepavadin bound. **e** Gold-standard Fourier shell correlation (GSFSC) curve and conical Fourier shell correlation (cFSC) | conical FSC area ratio (cFAR) plot.

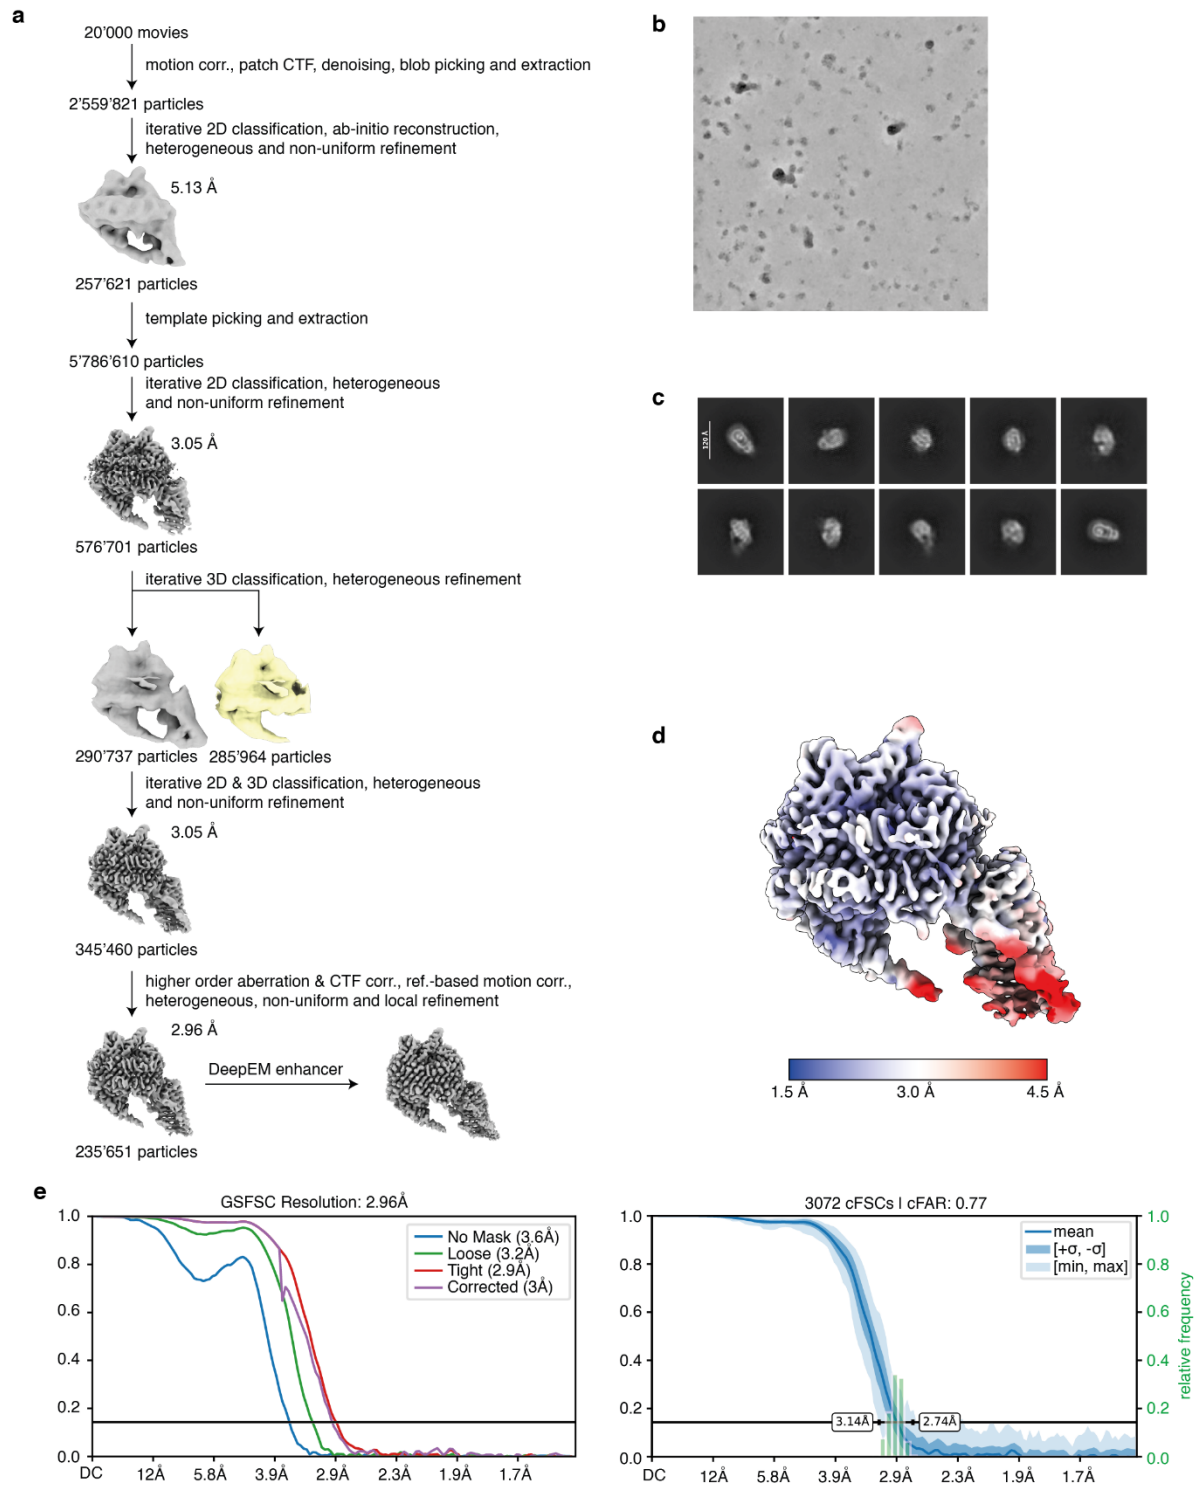

**Fig. S7. Cryo-EM data processing of apo LptDEM<sub>Pae</sub>.** **a** Schematic overview of the processing workflow. See Materials and Methods for details. **b** Representative example of a denoised micrograph. **c** Representative example classes that were selected during iterative 2D classification. **d** Local resolution map (red: low-resolution, blue: high-resolution). **e** Gold-standard Fourier shell correlation (GSFSC) curve and conical Fourier shell correlation (cFSC) | conical FSC area ratio (cFAR) plot.



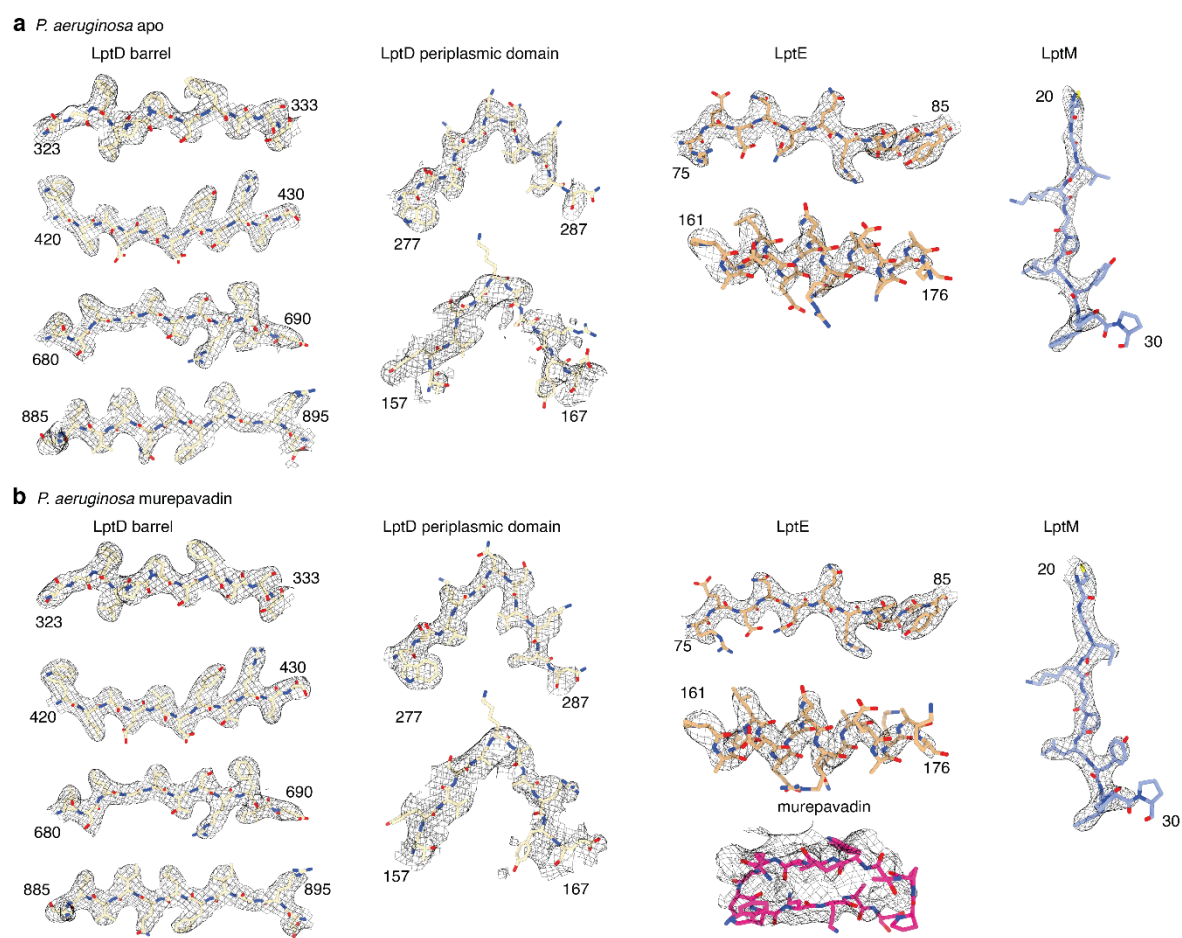

**Fig. S8. Structural models of LptDEM<sub>Pae</sub> apo and with murepavadin.** Representative examples of each chain of the model (LptD, LptE, LptM and murepavadin) at different regions of the structures, with the first and last amino acid number labeled, shown individually within the experimentally determined cryo-EM map (grey mesh) at appropriate contour levels of **a** apo LptDEM<sub>Pae</sub> and **b** LptDEM<sub>Pae</sub>–murepavadin.

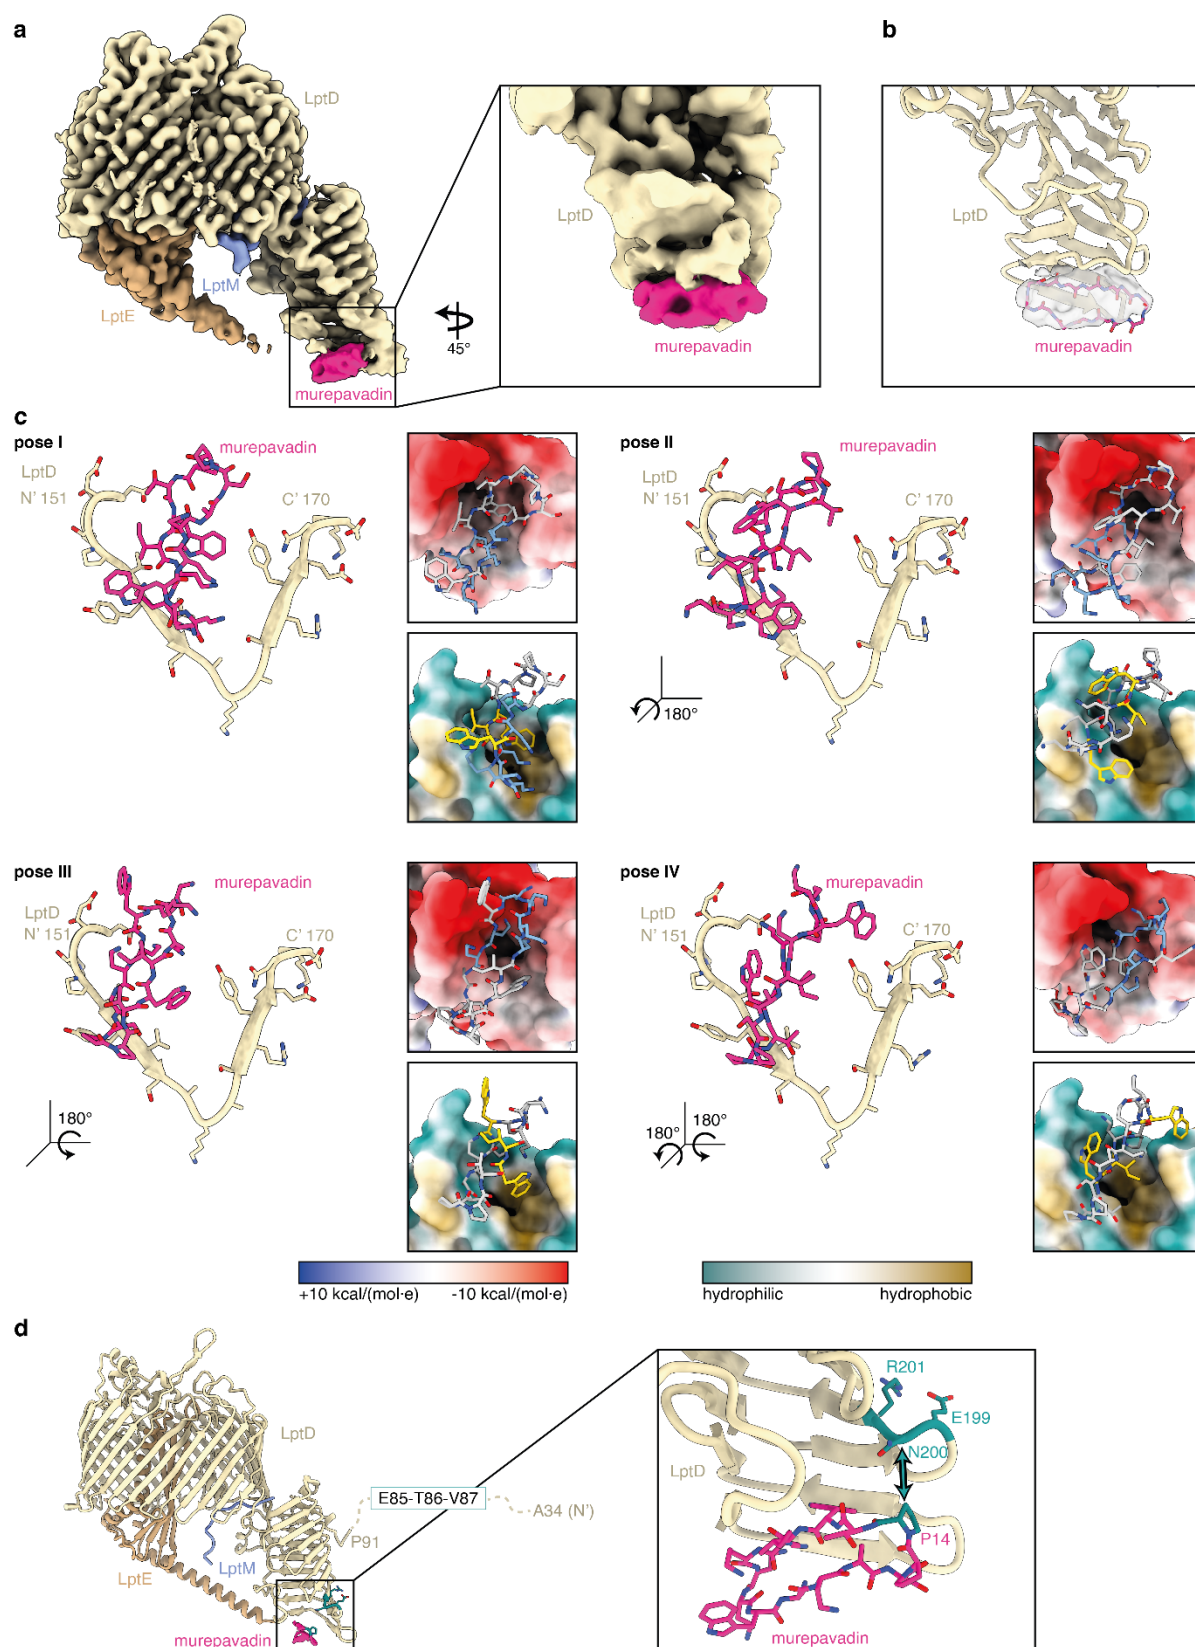

**Fig. S9. Molecular poses of murepavadin binding to LptDEM<sub>Pae</sub>.** **a** Cryo-EM reconstructions of LptDEM<sub>Pae</sub>-murepavadin, at representative contour levels for each subunit (LptDE<sub>Pae</sub>, beige; LptME<sub>Eco</sub>, blue; murepavadin, pink), with a close-up view of the density attributed to murepavadin. **b** Molecular model showing the possible backbone fit of murepavadin within its density (grey). **c**

Bottom view of the binding site with the four formally possible poses of murepavadin (I–IV). Each pose is shown in context of electrostatics and hydrophobicity of LptD, with highlighted positively charged residues (blue) or hydrophobic residues (yellow) of murepavadin. **d** Structure of LptDEM<sub>Pae</sub> with bound murepavadin. Residues E199–R201 of LptD, and Pro14 of murepavadin, which have previously been shown to be in close contact by chemical cross-linking are shown in turquoise.

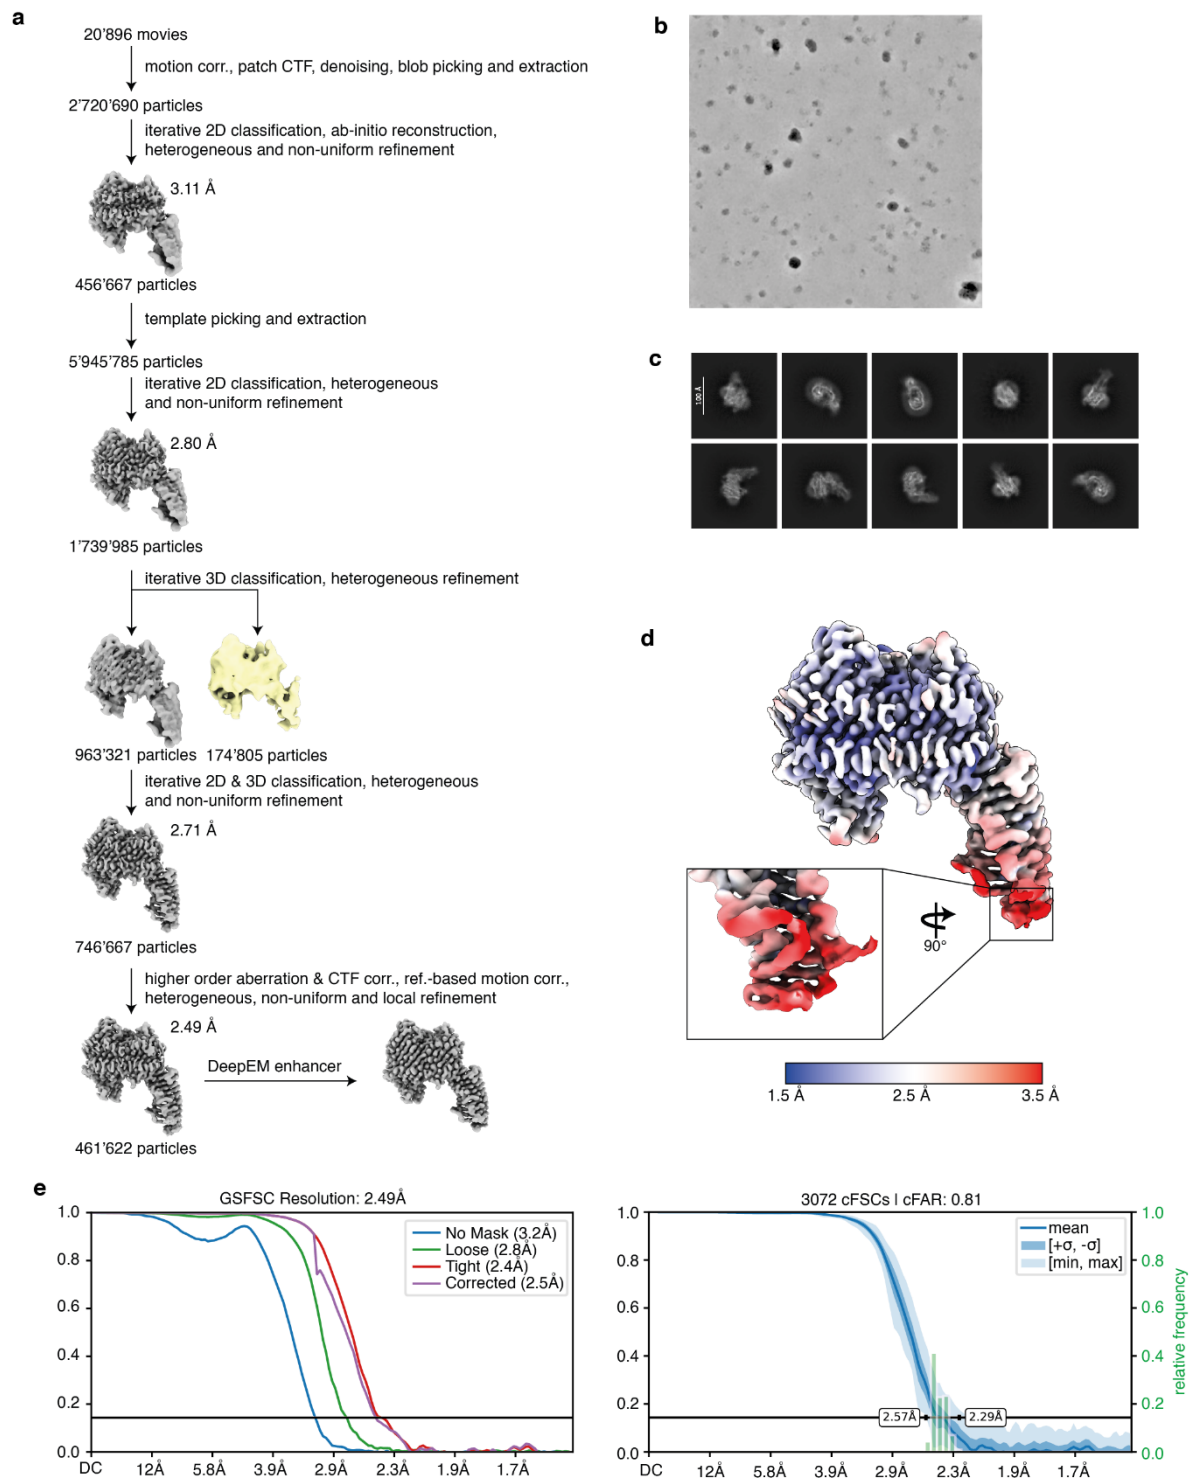

**Fig. S10. Cryo-EM data processing of LptDEM<sub>Eco</sub>-murepavadin.** **a** Schematic overview of the processing workflow. See Materials and Methods for details. **b** Representative example of a denoised micrograph. **c** Representative example classes that were selected during iterative 2D classification. **d** Local resolution map (red: low-resolution, blue: high-resolution) with a close-up of the distal LptD  $\beta$ -jellyroll domain with murepavadin bound. **e** Gold-standard Fourier shell correlation (GSFSC) curve and conical Fourier shell correlation (cFSC) | conical FSC area ratio (cFAR) plot.

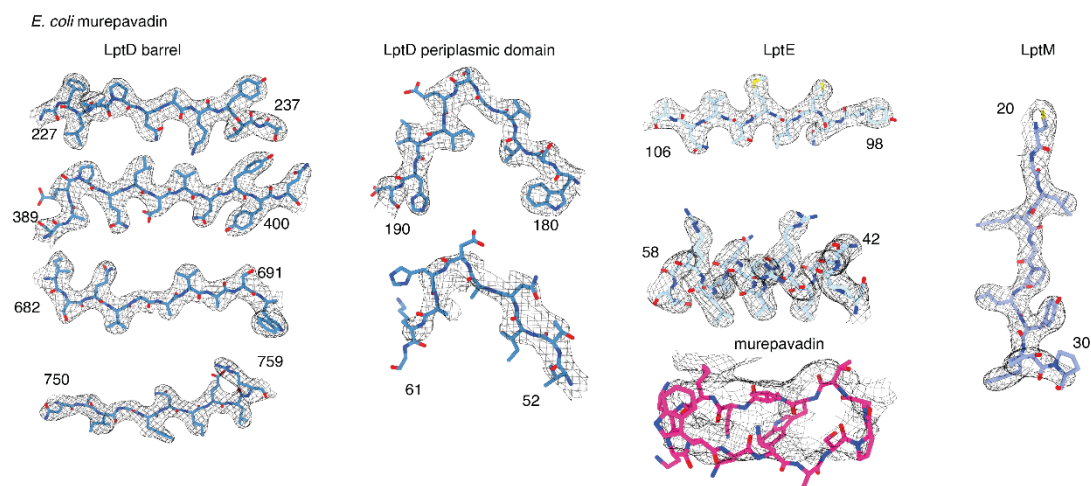

**Fig. S11. Structural model of LptDEM<sub>Eco</sub> with murepavadin.** Representative examples of each chain of the model (LptD, LptE, LptM and murepavadin) at different regions of the structures, with the first and last amino acid number labeled, shown individually within the experimentally determined cryo-EM map (grey mesh) at appropriate contour levels.



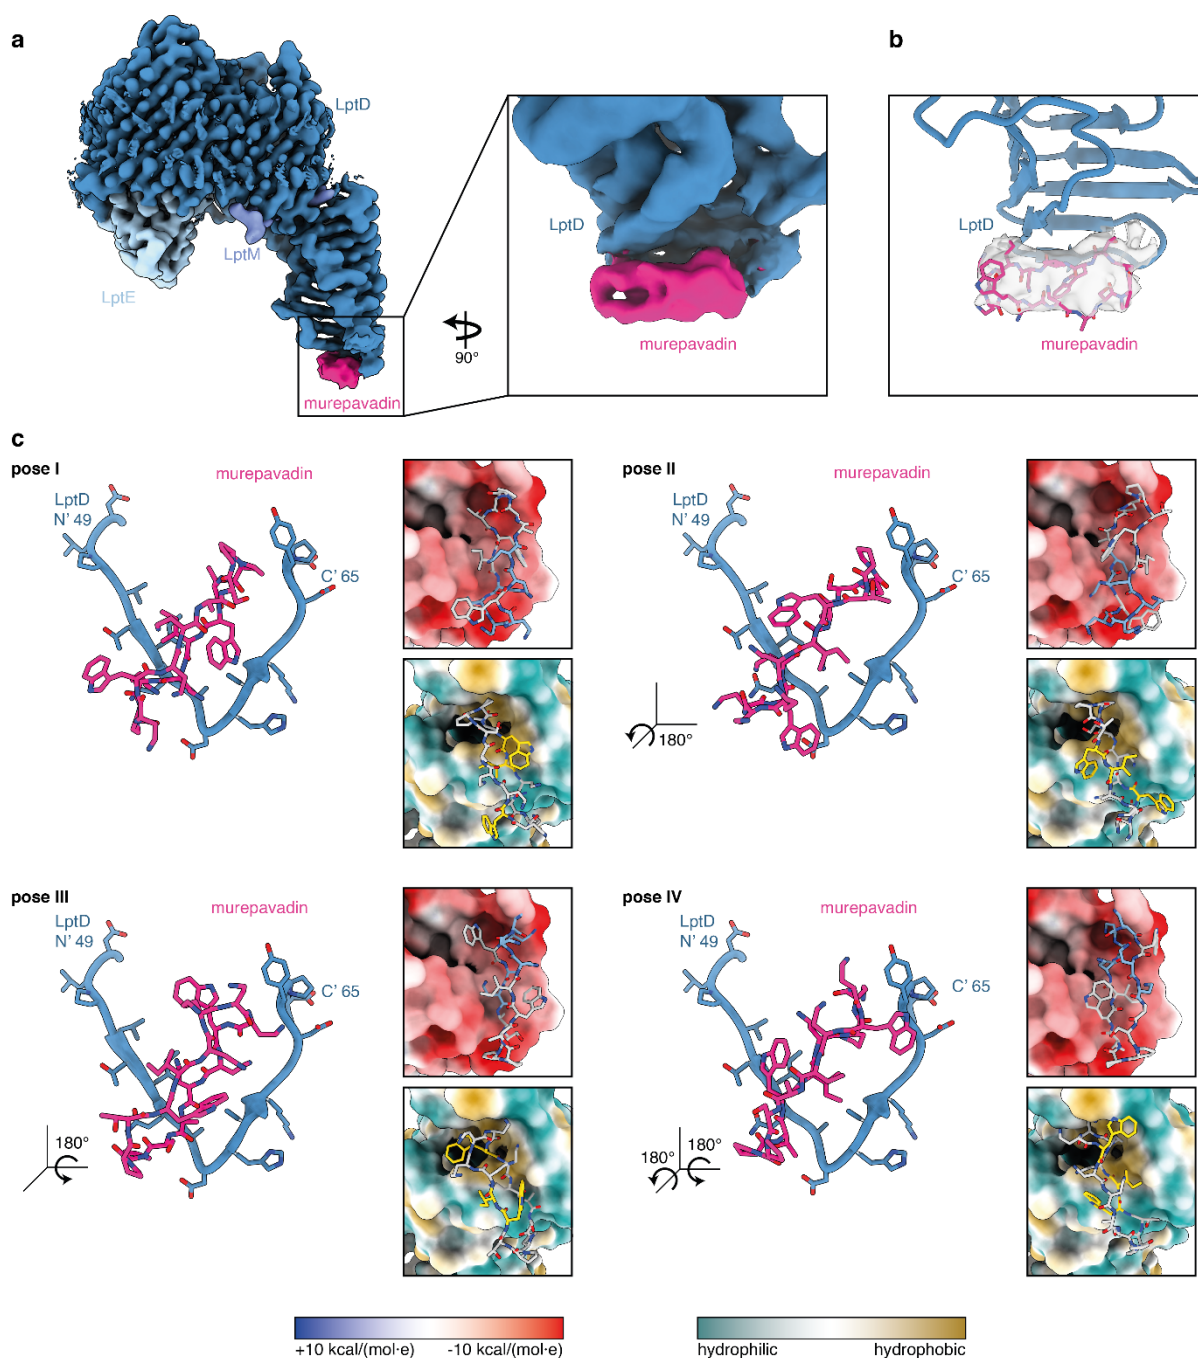

**Fig. S12. Molecular poses of murepavadin binding to LptDEM<sub>Eco</sub>.** **a** Cryo-EM reconstructions of LptDEM<sub>Eco</sub>-murepavadin, at representative contour levels for each subunit (LptDEM<sub>Eco</sub>, blue; murepavadin, pink), with a close-up view of the density attributed to murepavadin. **b** Molecular model showing the possible backbone fit of murepavadin within its density (grey). **c** Bottom view of the binding site with the four formally possible poses of murepavadin (I–IV). Each pose is shown in context of electrostatics and hydrophobicity of LptD, with highlighted positively charged residues (blue) or hydrophobic residues (yellow) of murepavadin. Pose I has the best match of electrostatics and hydrophobicity, whereas II, III and IV show partial electrostatic and hydrophobic mismatch between the ligand and the protein.

**Table S1.**

List of primers used in the study.

| Primer name | 5' – 3' sequence                                                      |
|-------------|-----------------------------------------------------------------------|
| prJS1714    | TTAATAAGGAGATATACCATGAAAAACGTATCCCCACTCTC                             |
| prJS1715    | GCGCCGAGCTCGAATTCGGATCCTCACAAAGTGTGTTGATACGGCAG                       |
| prJS1716    | TATAAGAAGGAGATATACATATGCGATATCTGGCAACATTGTTGTTATCTC                   |
| prJS1717    | GCGGTTTCTTTACCAGACTCGAGTCAATGATGGTGATGATGGTGGTGATGGTTACCCAGCGTGGTGGAG |
| prJS1976    | TGACTCGAGTCTGGTAAAGAAACC                                              |
| prJS2026    | TAATTCTAATGAATTTAATCACTGCCCCGCTTTCCAG                                 |
| prJS2027    | TTAAATTCATTAGAATTACTTGTTCATCGTCGTCCTTGATGTCGTAATCACCTGGGATGGAC        |
| prJS2028    | CGTCACCGGAATAATAATATCTC                                               |
| prJS2029    | ATTATTATCCGGTGACGGCGCAACGCAATTAATGTAAGTTAG                            |
| prJS2034    | AAGGCCTTCCTTAGCGCGCCCTCGAGTTATCACATTGCCTGGTCTCTC                      |
| prJS2035    | CGCGCTAAGGAAGGCCTTATGAAACGTATTTAACAAGTGCGG                            |
| prJS2093    | TTATTAAGTGGGTGCAACTTAAACAAAATTATTTCTACAGGGGAATTG                      |
| prJS2094    | GTTGCACCCACTTAATAAGGAGGTCAGGCCATGGCCGTCAAAAGTCTGG                     |
| prJS2097    | TATGACTTACCTCCTTATCAATGATGGTGATGATGGTGG                               |
| prJS2098    | GATAAGGAGGTAAGTCATATGAAAAACGTGTTAAGGCACTC                             |
| prJS2099    | TTTACCAGACTCGAGTCACTTGTTCATCGTCGTCCTTGATG                             |

**Table S2.**

Cryo-EM data collection and refinement statistics.

|                                           | LptDEM <sub>Eco</sub><br>(EMDB-X)<br>(PDB XXX) | LptDEM <sub>Eco</sub> –<br>thanatin<br>(EMDB-X)<br>(PDB XXX) | LptDEM <sub>Eco</sub> –<br>murepavadin<br>(EMDB-X)<br>(PDB XXX) | LptDEM <sub>Paε</sub><br>(EMDB-X)<br>(PDB XXX) | LptDEM <sub>Paε</sub> –<br>murepavadin<br>(EMDB-X)<br>(PDB XXX) |
|-------------------------------------------|------------------------------------------------|--------------------------------------------------------------|-----------------------------------------------------------------|------------------------------------------------|-----------------------------------------------------------------|
| Data collection and processing            |                                                |                                                              |                                                                 |                                                |                                                                 |
| Magnification                             | 165,000x                                       | 165,000x                                                     | 165,000x                                                        | 165,000x                                       | 165,000x                                                        |
| Voltage (kV)                              | 300                                            | 300                                                          | 300                                                             | 300                                            | 300                                                             |
| Electron exposure (e–/Å <sup>2</sup> )    | 50                                             | 50                                                           | 50                                                              | 50                                             | 50                                                              |
| Defocus range (μm)                        | -0.6 to -2.0                                   | -0.6 to -2.0                                                 | -0.6 to -2.0                                                    | -0.6 to -2.0                                   | -0.6 to -2.0                                                    |
| Pixel size (Å)                            | 0.73                                           | 0.73                                                         | 0.73                                                            | 0.73                                           | 0.73                                                            |
| Symmetry imposed                          | C1                                             | C1                                                           | C1                                                              | C1                                             | C1                                                              |
| Initial particle images (no.)             | 2,814,993                                      | 5,205,377                                                    | 2,720,690                                                       | 2,559,821                                      | 11,667,764                                                      |
| Final particle images (no.)               | 514,654                                        | 320,944                                                      | 461,622                                                         | 235,651                                        | 260,951                                                         |
| Map resolution (Å)                        | 2.51                                           | 2.73                                                         | 2.49                                                            | 2.96                                           | 2.57                                                            |
| FSC threshold                             | 0.143                                          | 0.143                                                        | 0.143                                                           | 0.143                                          | 0.143                                                           |
| Map resolution range (Å)                  | 1.6–29.5                                       | 1.8–35.3                                                     | 1.6–25.8                                                        | 1.7–26.3                                       | 1.7–32.1                                                        |
| Refinement                                |                                                |                                                              |                                                                 |                                                |                                                                 |
| Initial model used                        | AlphaFold,<br><i>ab-initio</i>                 | AlphaFold,<br><i>ab-initio</i>                               | AlphaFold,<br><i>ab-initio</i>                                  | AlphaFold,<br><i>ab-initio</i>                 | AlphaFold,<br><i>ab-initio</i>                                  |
| Model resolution (Å)                      | 2.7                                            | 2.9                                                          | 3.1                                                             | 3.2                                            | 3.2                                                             |
| FSC threshold                             | 0.5                                            | 0.5                                                          | 0.5                                                             | 0.5                                            | 0.5                                                             |
| Map sharpening B factor (Å <sup>2</sup> ) | 104.7                                          | 107.6                                                        | 103.0                                                           | 112.7                                          | 95.8                                                            |
| Model composition                         |                                                |                                                              |                                                                 |                                                |                                                                 |
| Non-hydrogen atoms                        | 7,445<br>925                                   | 7,613<br>946                                                 | 7556<br>939                                                     | 8,207<br>1024                                  | 8,318<br>1038                                                   |
| Protein residues                          |                                                |                                                              |                                                                 |                                                |                                                                 |
| B factors (Å <sup>2</sup> )               |                                                |                                                              |                                                                 |                                                |                                                                 |
| Protein                                   | 62.26                                          | 101.76                                                       | 126.90                                                          | 142.04                                         | 137.01                                                          |
| R.m.s. deviations                         | 0.010                                          |                                                              |                                                                 |                                                |                                                                 |
| Bond lengths (Å)                          | 0.883                                          | 0.006                                                        | 0.005                                                           | 0.003                                          | 0.004                                                           |
| Bond angles (°)                           |                                                | 0.833                                                        | 0.512                                                           | 0.581                                          | 0.576                                                           |
| Validation                                |                                                |                                                              |                                                                 |                                                |                                                                 |
| MolProbity score                          | 0.74                                           | 0.58                                                         | 1.05                                                            | 0.97                                           | 1.06                                                            |
| Clashscore                                | 0.76                                           | 0.20                                                         | 0.95                                                            | 0.97                                           | 2.09                                                            |
| Poor rotamers (%)                         | 0                                              | 0.12                                                         | 0.37                                                            | 0.11                                           | 0.91                                                            |
| Ramachandran plot                         |                                                |                                                              |                                                                 |                                                |                                                                 |
| Favored (%)                               | 98.15                                          | 98.19                                                        | 96.09                                                           | 98.53                                          | 97.65                                                           |
| Allowed (%)                               | 1.85                                           | 1.81                                                         | 3.91                                                            | 1.47                                           | 2.25                                                            |
| Disallowed (%)                            | 0.0                                            | 0.0                                                          | 0.0                                                             | 0.0                                            | 0.1                                                             |

**Table S3.**Alanine-scan of murepavadin with indicated MIC on three different *P. aeruginosa* strains.<sup>a</sup>

| <i>Pae</i><br>strain | mur  | T1    | W2 | I3 | Dab4 | Orn5  | DDab<br>6 | Dab7 | W8 | Dab9  | Dab10 | S12   | DP13  | P14  |
|----------------------|------|-------|----|----|------|-------|-----------|------|----|-------|-------|-------|-------|------|
| PAO1                 | 0.06 | 0.06  | >4 | 4  | 0.5  | 0.5   | 0.25      | 1    | >4 | 1.125 | 1     | 0.075 | 0.185 | 0.12 |
| ATCC<br>27853        | 0.03 | 0.03  | >4 | 1  | 0.25 | 0.375 | 0.12      | 0.25 | >4 | 0.12  | 0.5   | 0.045 | 0.09  | 0.06 |
| Walter               | 0.03 | 0.045 | >4 | 3  | 0.75 | 1     | 0.25      | 1    | >4 | 0.5   | >4    | 0.045 | 0.09  | 0.25 |

<sup>a</sup> Cells are colored in a green-yellow-red gradient from green = 0.03 to red = >4.
